# Supplementary material for: Establishment of CMab-43, a Sensitive and Specific Anti-CD133 Monoclonal Antibody, for Immunohistochemistry
Source: PubMed Central journal article supplement (PMC6975129; doi:10.1089/mab.2017.0031), 2017-10-01
Supplement: Supp_Fig1.pdf [file Supp_Fig1.pdf]

## Supplementary Data

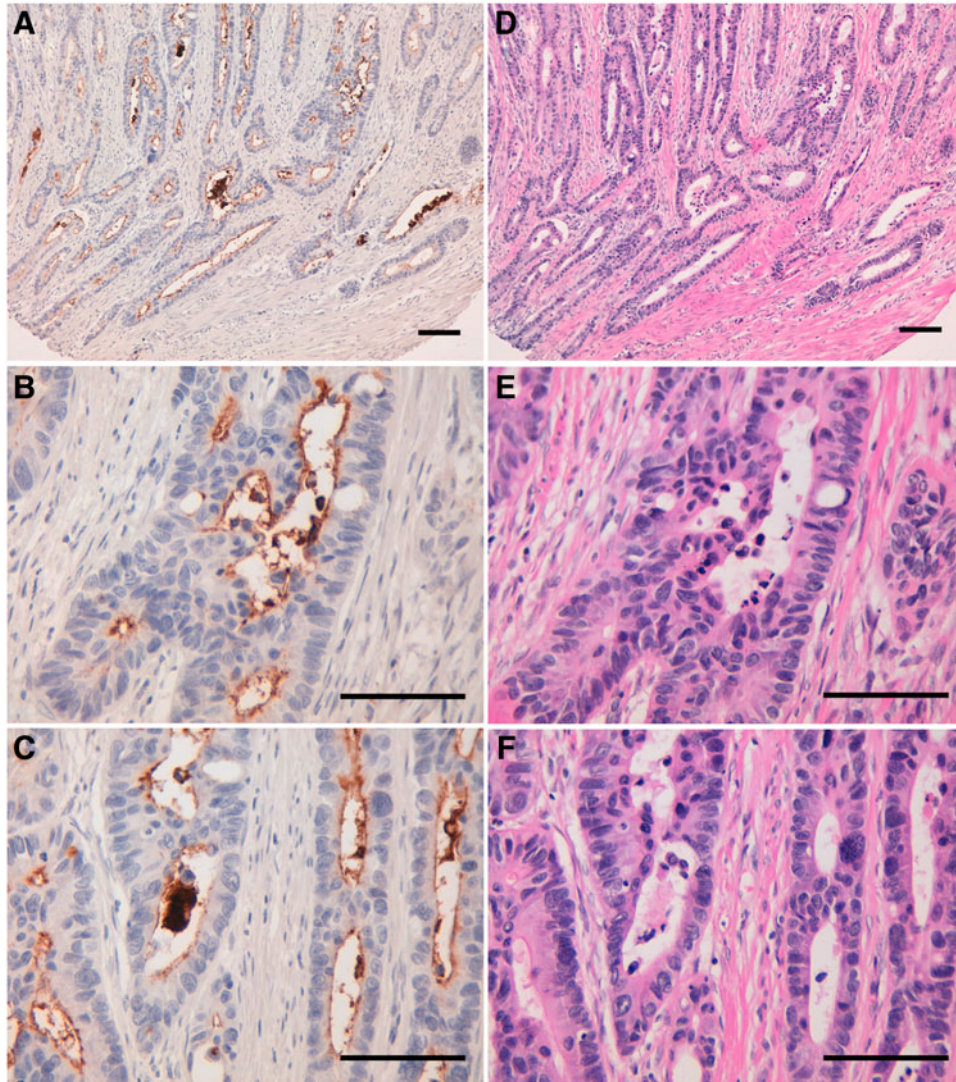

**SUPPLEMENTARY FIG. S1.** Immunohistochemical analysis of colon cancer by CMAb-43. (A–C) Sections of colon cancer (Case No. 1) were incubated with 1  $\mu\text{g}/\text{mL}$  of CMAb-43, followed by the Envision+ kit. Color was developed using DAB and counterstained with hematoxylin. (D–F) Serial sections were also stained using hematoxylin and eosin. Scale bar: 100  $\mu\text{m}$ . DAB, 3,3-diaminobenzidine tetrahydrochloride.
