# Supplementary material for: Establishment of CMab-43, a Sensitive and Specific Anti-CD133 Monoclonal Antibody, for Immunohistochemistry
Source: PubMed Central journal article supplement (PMC6975129; doi:10.1089/mab.2017.0031), 2017-10-01
Supplement: Supp_Fig2.pdf [file Supp_Fig2.pdf]

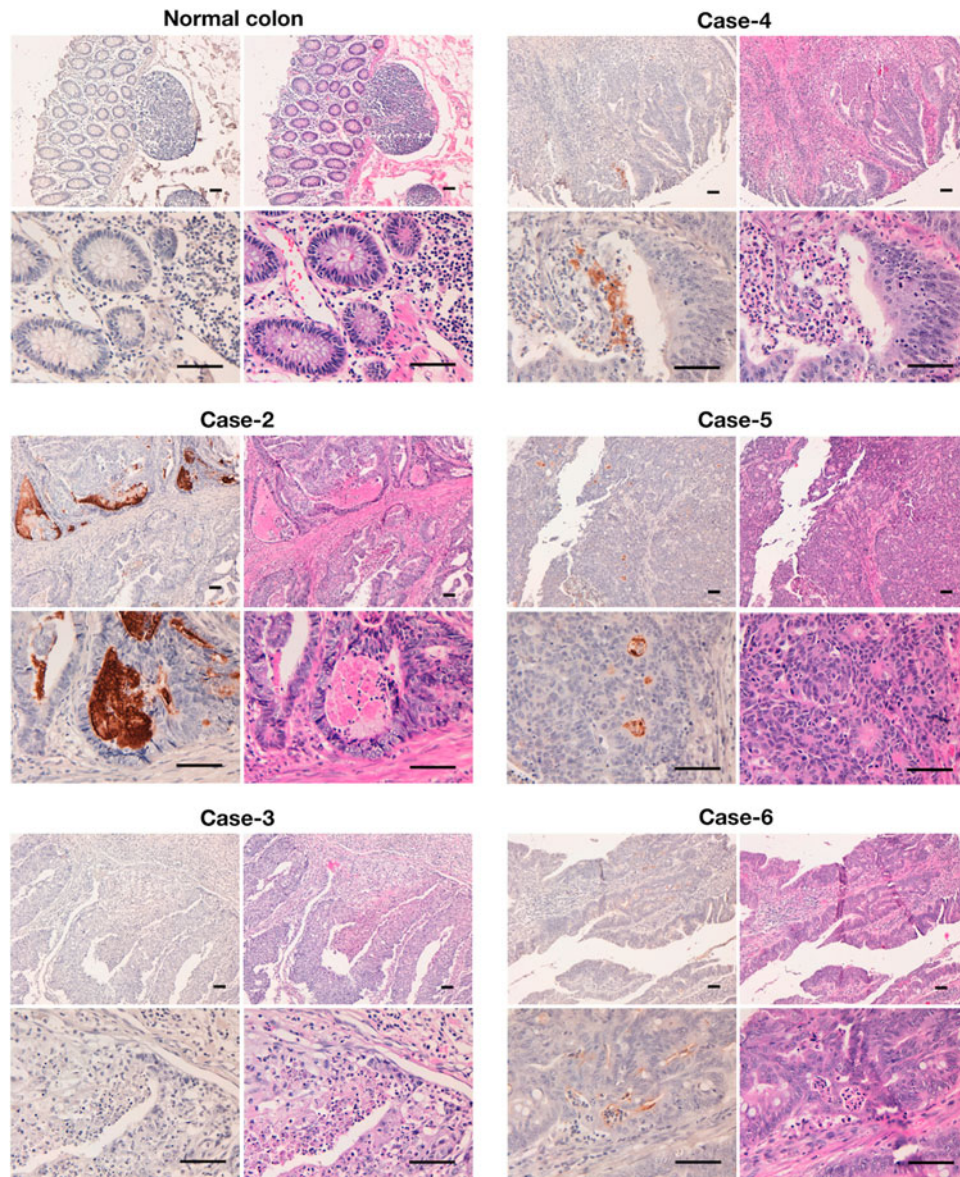

**SUPPLEMENTARY FIG. S2.** Immunohistochemical analysis of colon cancer by C Mab-43. Sections of normal colon and colon cancer (Case Nos. 2–6) were incubated with 1 μg/mL of C Mab-43, followed by the Envision+ kit. Color was developed using DAB and counterstained with hematoxylin. Serial sections were also stained using hematoxylin and eosin. Scale bar: 100 μm.
